# Supplementary material for: The Protective Effect of (-)-Tetrahydroalstonine against OGD/R-Induced Neuronal Injury via Autophagy Regulation
Source: MDPI journal article supplement (doi:10.3390/molecules28052370), 2023-03-04
Supplement: s1 [file s1]

---

## Supplementary Materials

### **The Protective Effect of (-)-Tetrahydroalstonine against OGD/R-Induced Neuronal Injury via Autophagy Regulation**

Yumei Liao <sup>1,2,†</sup>, Jun-Ya Wang <sup>3,†</sup>, Yan Pan <sup>2,†</sup>, Xueyi Zou <sup>2,3,†</sup>, Chaoqun Wang <sup>2</sup>, Yinghui Peng <sup>2</sup>, Yun-Lin Ao <sup>3</sup>, Mei Fong Lam <sup>4</sup>, Xiaoshen Zhang<sup>1</sup>, Xiao-Qi Zhang <sup>3,5,\*</sup>, Lei Shi <sup>1,2</sup>, Shiqing Zhang <sup>2,\*</sup>

<sup>1</sup> *Department of Cardiovascular Surgery, The First Affiliated Hospital, Jinan University, Guangzhou 510632, China*

<sup>2</sup> *JNU-HKUST Joint Laboratory for Neuroscience and Innovative Drug Research, College of Pharmacy, Jinan University, Guangzhou 510632, China*

<sup>3</sup> *Guangdong Provincial Engineering Research Center for Modernization of TCM, College of Pharmacy, Jinan University, Guangzhou 510632, China*

<sup>4</sup> *Centro Hospitalar Conde de São Januário, Macau, China*

<sup>5</sup> *NMPA Key Laboratory for Quality Evaluation of TCM, Jinan University, Guangzhou 510632, China*

<sup>†</sup> These authors contributed equally to the study.

\* Corresponding author: sqzhang@jnu.edu.cn (Shiqing Zhang); xqzhang74@hotmail.com (Xiao-Qi Zhang)

### Identification of (–)-Tetrahydroalstonine

(–)-Tetrahydroalstonine:  $[\alpha]_{\text{D}}^{25}$  -93.5 (c 0.90, CH<sub>3</sub>OH); UV (CH<sub>3</sub>OH)  $\lambda_{\text{max}}$  (log  $\epsilon$ ) 226 (3.92), 285 (0.76); IR (KBr)  $\nu_{\text{max}}$  3420, 1698, 2875, 1627, 1541, 1455 cm<sup>-1</sup>; HR-ESI-MS at  $m/z$  353.1789 [M+H]<sup>+</sup> (calcd for C<sub>21</sub>H<sub>25</sub>N<sub>2</sub>O<sub>3</sub>, 353.1787); <sup>1</sup>H-NMR (CD<sub>3</sub>OD,  $\delta_{\text{H}}$  = 4.87 ppm, 600 MHz),  $\delta_{\text{H}}$ : 7.55 (1H, s, H-17), 7.35 (1H, d,  $J$  = 7.8, H-9), 7.26 (1H, d,  $J$  = 7.8, H-12), 7.00 (1H, t,  $J$  = 7.8, H-11), 6.93 (1H, t,  $J$  = 7.8, H-10), 4.48 (1H, m, H-19), 3.73 (3H, s, COOCH<sub>3</sub>), 3.32 (1H, m, H-3), 3.15 (1H, d,  $J$  = 12.5, H-21a), 3.00 (1H, m, H-5a), 2.92 (1H, m, H-6a), 2.74 (1H, m, H-15), 2.71-2.64 (3H, overlapped, H-21b, H-6b and H-14a), 2.51 (1H, m, H-5b), 1.69 (1H, m, H-20), 1.42 (1H, m, H-14b), 1.37 (3H, d,  $J$  = 6.2, H-18); <sup>13</sup>C-NMR (CD<sub>3</sub>OD,  $\delta_{\text{C}}$  = 49.0 ppm, 150 MHz),  $\delta_{\text{C}}$ : 169.6 (s, C-22), 156.9 (s, C-17), 138.1 (s, C-13), 135.6 (s, C-2), 128.3 (s, C-8), 121.8 (s, C-11), 119.7 (s, C-10), 118.5 (s, C-9), 112.0 (s, C-12), 110.9 (s, C-16), 108.0 (s, C-7), 73.6 (s, C-19), 61.8 (s, C-3), 57.1 (s, C-21), 54.8 (s, C-5), 51.7 (s, C-23), 39.9 (s, C-20), 34.8 (s, C-14), 32.7 (s, C-15), 22.5 (s, C-6), 18.9 (s, C-18). The parameters of the spectrograms are shown in the following figures.

### Supplementary Figures

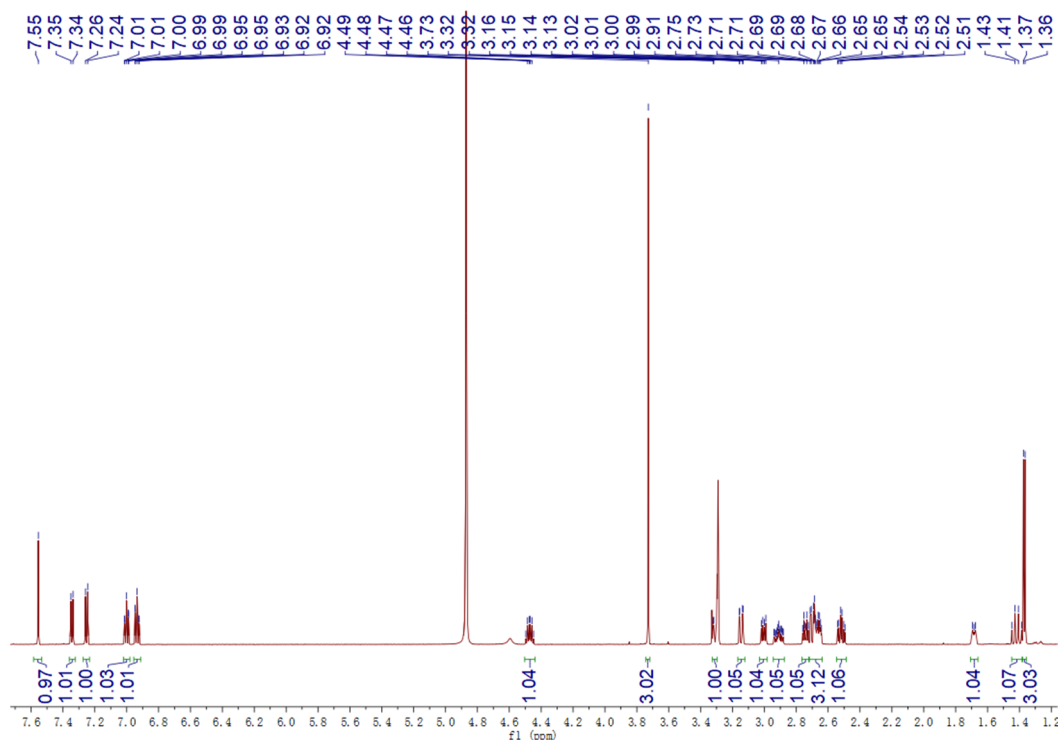

**Figure S1.** <sup>1</sup>H NMR spectrum of (–)-Tetrahydroalstonine (600 Hz, CD<sub>3</sub>OD)

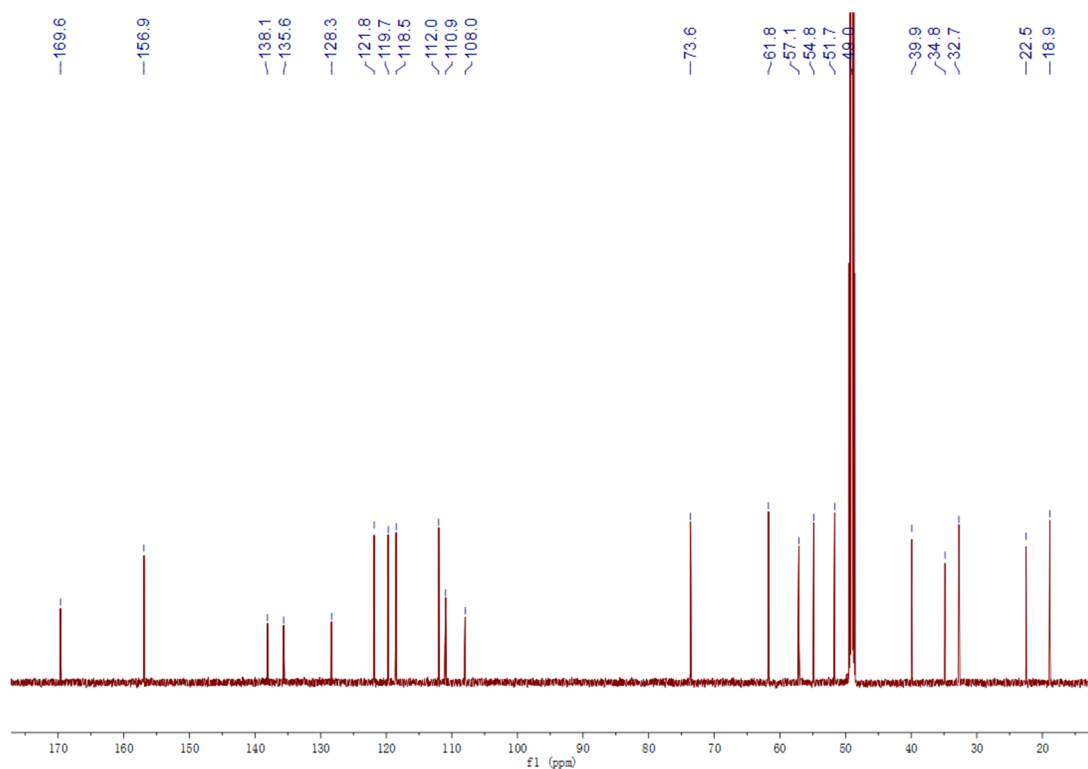

**Figure S2.** <sup>13</sup>C NMR spectrum of (-)-Tetrahydroalstonine (150 Hz, CD<sub>3</sub>OD)

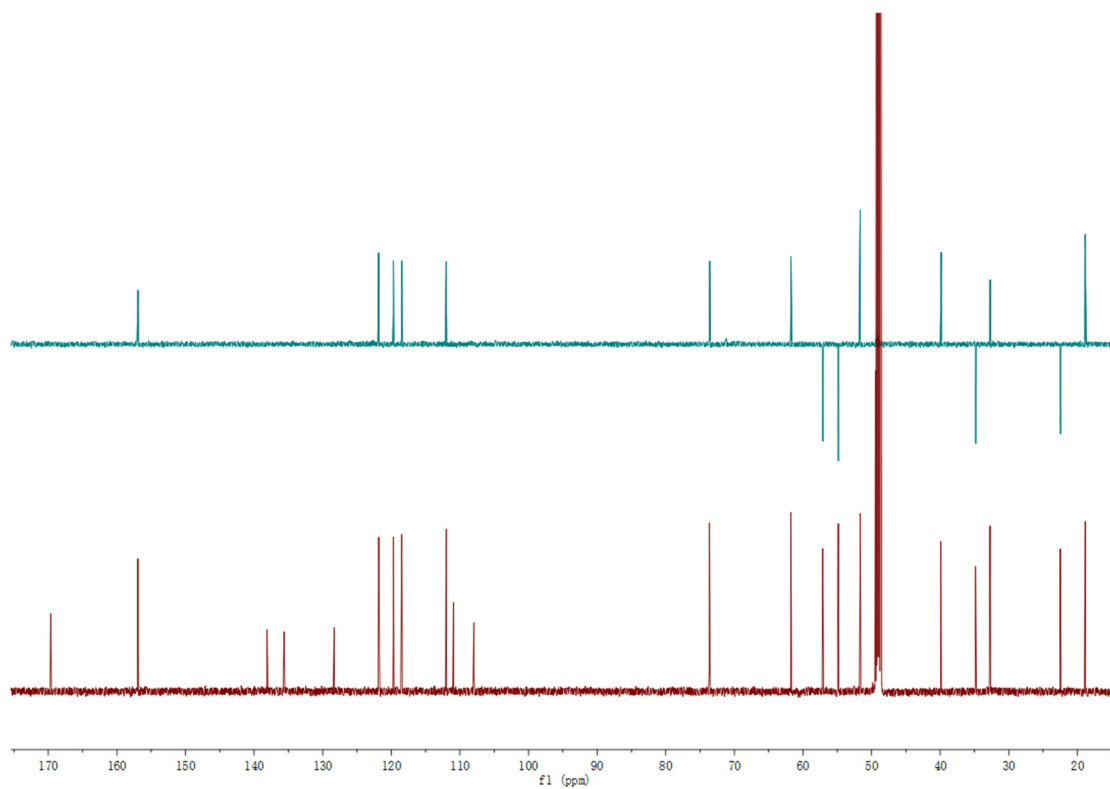

**Figure S3.** DEPT-135 spectrum of (-)-Tetrahydroalstonine (150 Hz, CD<sub>3</sub>OD)
